# Supplementary material
Source: Springer Nature journal article supplement (https://www.springermedizin.de/resource/supplementary/12888_2007_472_MOESM5_ESM.pdf/9483354)
Supplement: MOESM5 [file 9483354]

271 twin pairs living in Stockholm area

156 (312 individuals) twin pairs  
accepted a clinical investigation  
and assessment

female =177 male= 135  
Mean age 16 year (14.5 – 17.10) year

115 twin pairs  
didn't want to participate (67 families)  
or didn't answer letter or  
phone (48 families)

247 individuals complete data with blood test

female= 142                      male=105

Sample of genetic association analyses

female=105                      male=92
